# Supplementary material for: Liquid metal nano/micro-channels as thermal interface materials for efficient energy saving
Source: Royal Society of Chemistry journal article supplement (doi:10.1039/c8tc03417f), 2018-01-01
Supplement: c8tc03417f1.pdf [file c8tc03417f1.pdf]

## Supporting Information

### Liquid metal nano/micro-channels for efficient energy saving in thermal interface materials

*Liuying Zhao, Huiqiang Liu, Xuechen Chen\*, Sheng Chu\*, Han Liu, Zuoye Lin, Qiuguo Li, Guang Chu, and Hang Zhang*

#### 1. Summary of Silicone thermal pads with different fillers

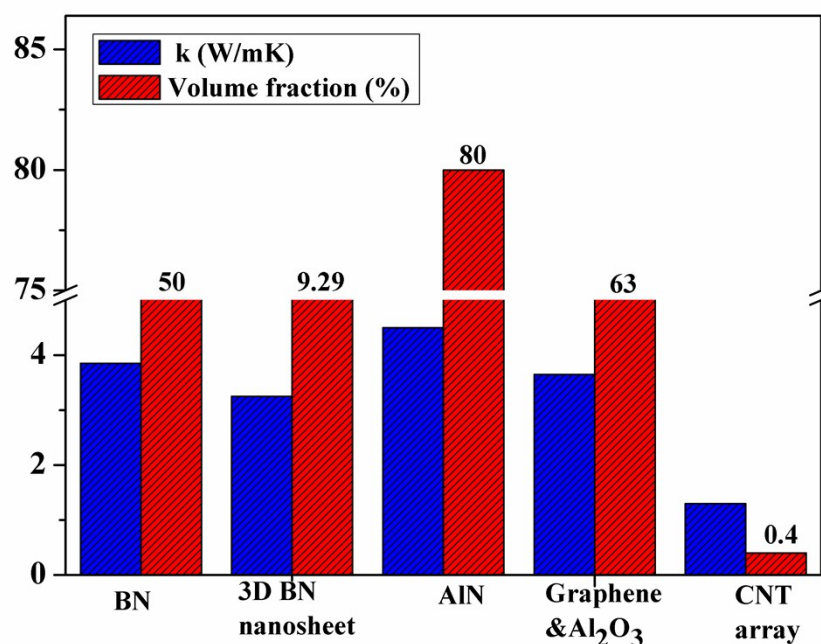

Figure S1 Thermal conductivity and volume filling ratios of silicone pads with different fillers from literatures.

#### 2. Deformation diagram of LM/PDMS composite

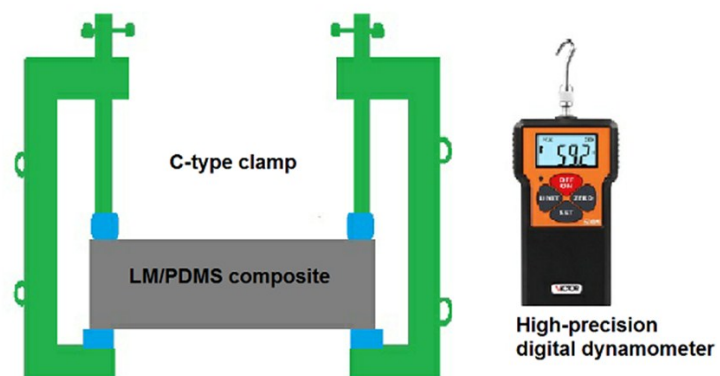

Figure S2 The deformation operation of LM/PDMS composite is done by exert different external tensile force.

### 3. EDS mapping for different elements

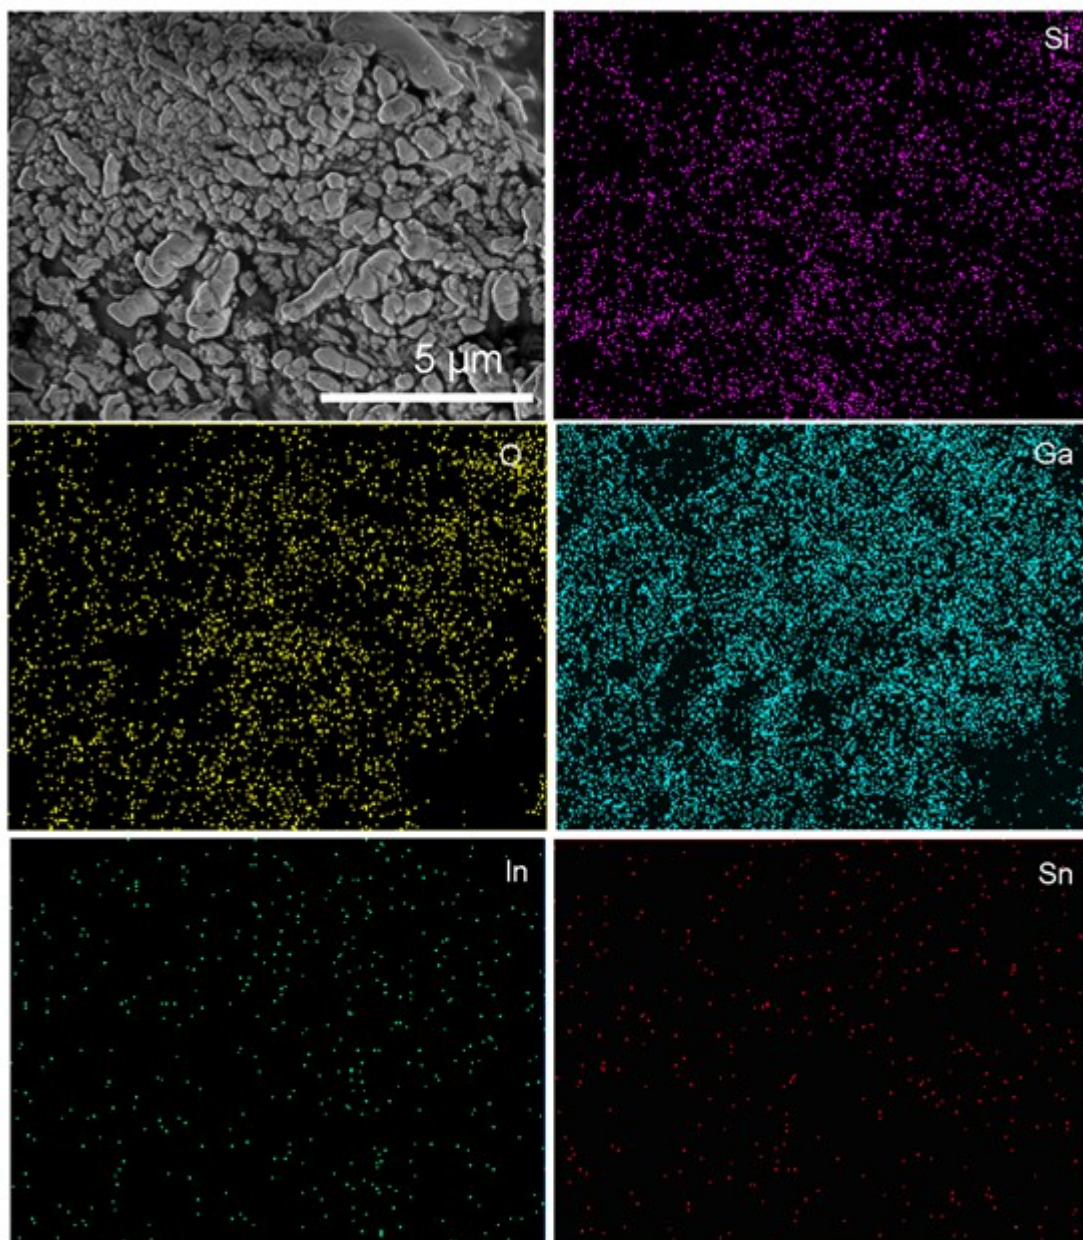

Figure S3 The EDS mapping pictures of Si, O, Ga, In, and Sn elements from the LM/PDMS composite pad.

4. comparison diagram of thermal resistance vs thickness between sample 1 (red line ) and sample 2 (black line)

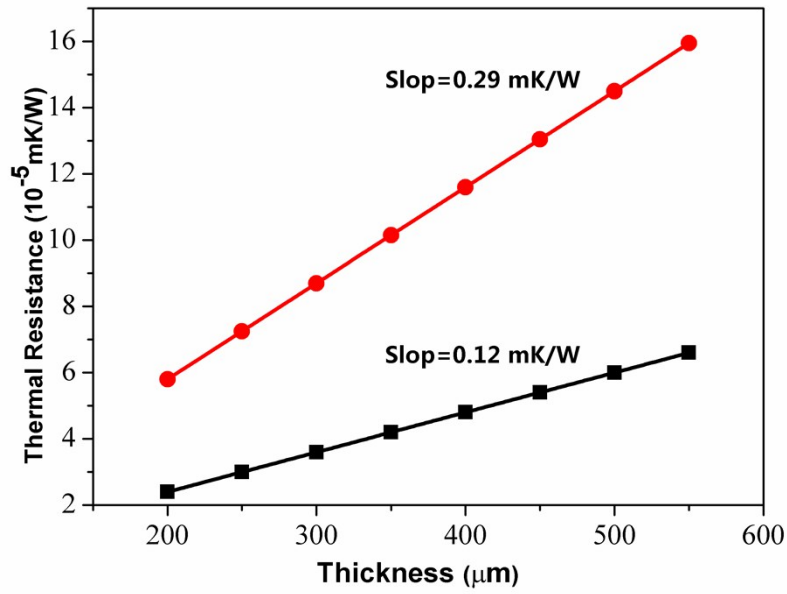

Figure S4 The comparison diagram of thermal resistance vs thickness between sample 1 (red line ) and sample 2 (black line)

## 5. Electrical conductivity of the LM/PDMS composite

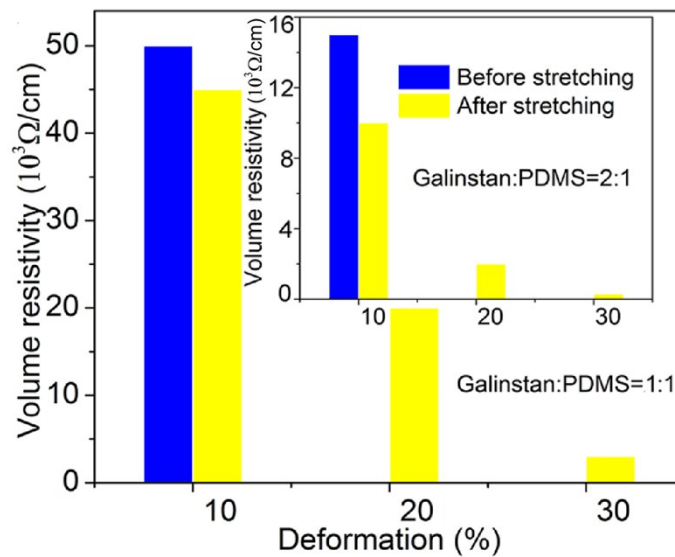

Figure S5 Volume resistivity of the LM/PDMS=1:1 composite at different deformation. Inset: Volume resistivity of the LM/PDMS=2:1 composite at different deformation.
